# Supplementary material for: Metal oxide patterns of one-dimensional nanofibers: on-demand, direct-write fabrication, and application as a novel platform for gas detection
Source: Royal Society of Chemistry journal article supplement (doi:10.1039/c9ta09708b), 2019-01-01
Supplement: c9ta09708b1.pdf [file c9ta09708b1.pdf]

Supplementary Information

**Metal oxide patterns of one-dimensional nanofibers: On-demand, direct-write fabrication, and application as a novel platform for gas detection**

*Kyeorei Lim,<sup>a</sup> Young-Moo Jo,<sup>a</sup> Ji-Wook Yoon,<sup>b,\*</sup> and Jong-Heun Lee<sup>a,\*</sup>*

<sup>a</sup>Department of Materials Science and Engineering, Korea University, Seoul 02841, Republic of Korea

<sup>b</sup>Department of Information Materials Engineering, Division of Advanced Materials Engineering, Jeonbuk National University, Jeonju 54896, Korea

E-mail: [jwyoona@jbnu.ac.kr](mailto:jwyoona@jbnu.ac.kr) (Ji-Wook Yoon), [jongheun@korea.ac.kr](mailto:jongheun@korea.ac.kr) (Jong-Heun Lee)

## SUPPLEMENTARY FIGURES

Figure S1

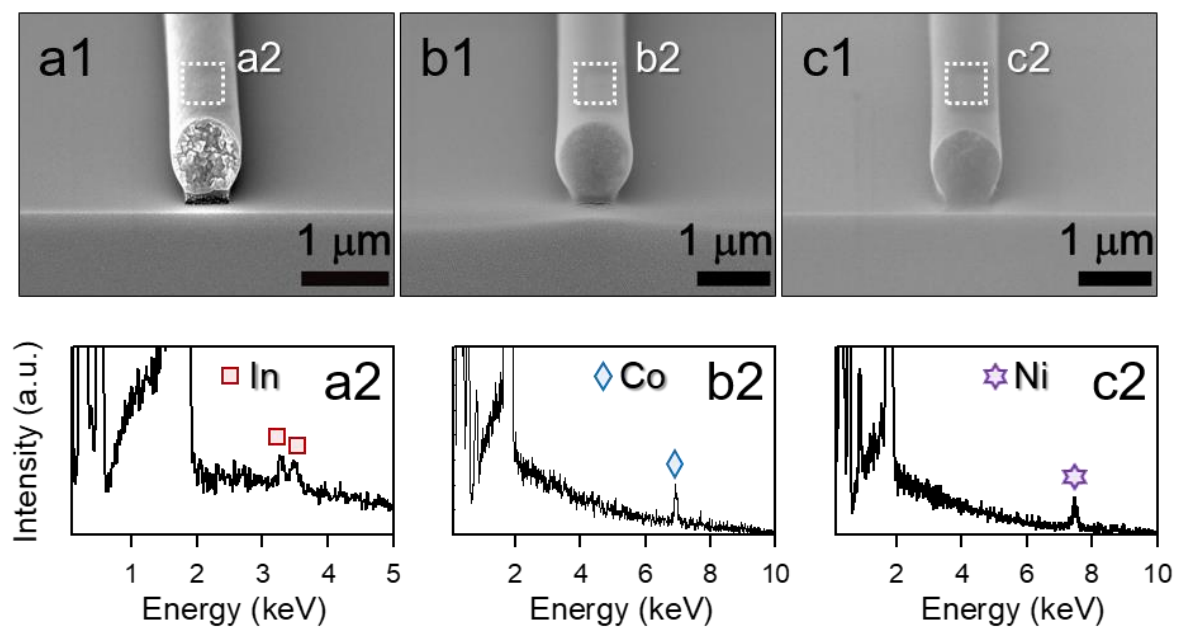

**Figure S1** (a1-c1) Cross-sectional SEM images of (a1) In/PVP, (b1) Co/PVP, and (c1) Ni/PVP precursor fibers. (a2-c2) EDS analysis results for the (a2) In/PVP, (b2) Co/PVP, and (c2) Ni/PVP.

**Figure S2**

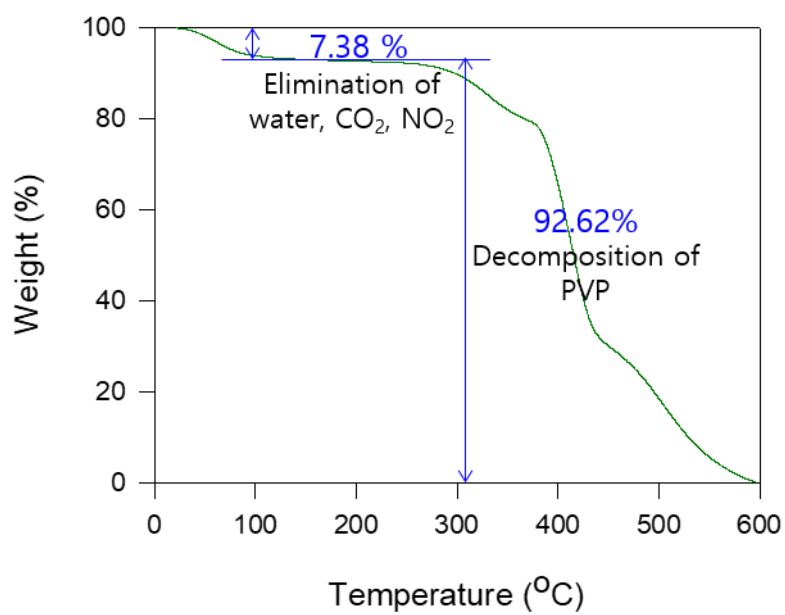

**Figure S2** Thermal gravimetric analysis (TGA) of PVP ( $M_w=1,300,000$ ).

**Figure S3**

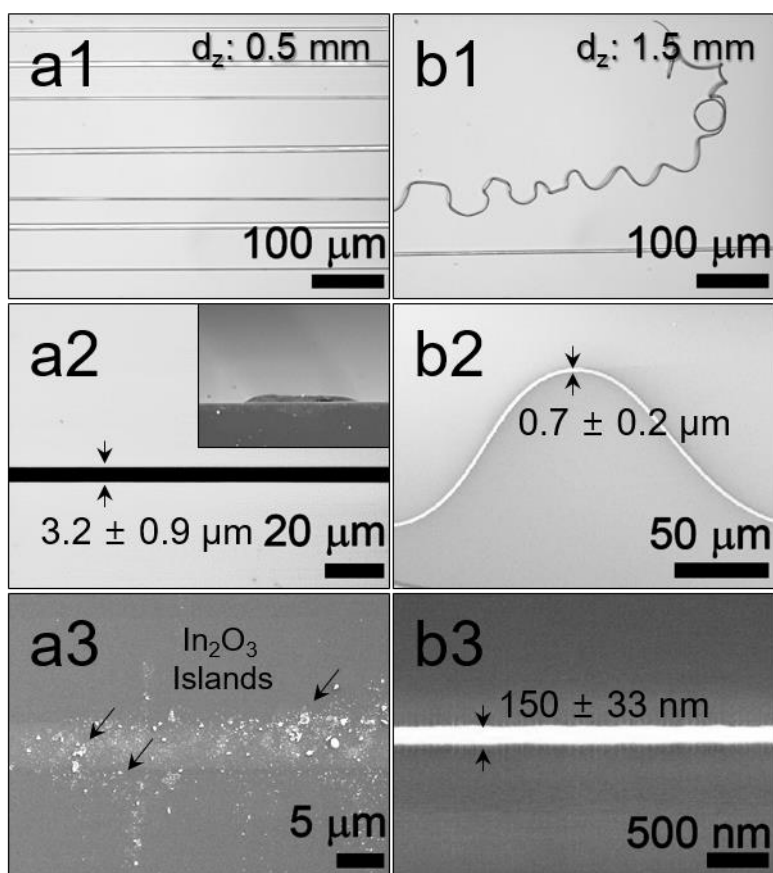

**Figure S3** (a1,b1) Optical and (a2,b2) SEM images of In/PVP arrays fabricated at the  $d_z$  of (a1,a2) 0.5 and (b1,b2) 1.5 mm. (a3,b3) SEM images of  $\text{In}_2\text{O}_3$  after heat treatment of the corresponding In/PVP at  $600^\circ\text{C}$  for 5 h (number of measurement for determining the width of nanofiber: 10).

**Figure S4**

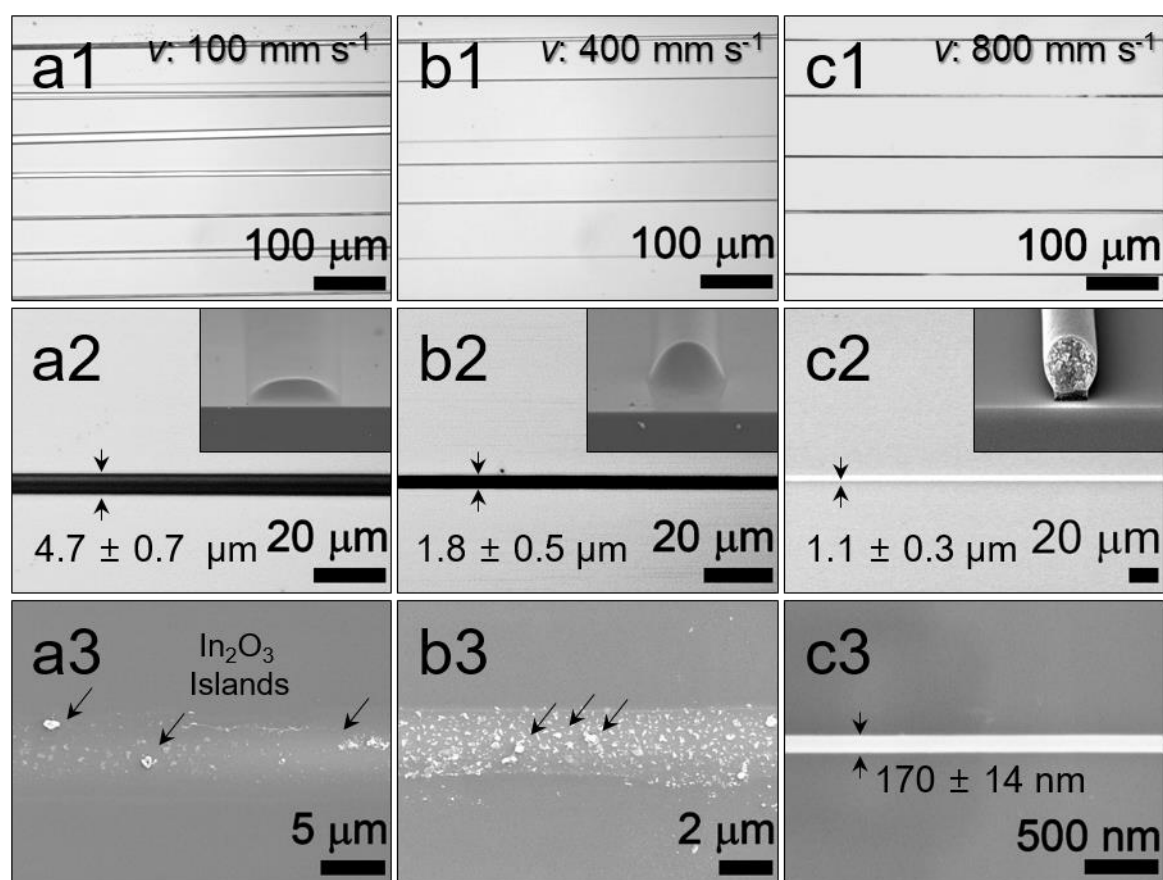

**Figure S4** (a1-c1) Optical and (a2-c2) SEM images of In/PVP arrays at the  $v$  of (a1,a2) 100, (b1,b2) 400, and (c1,c2) 800 mm s<sup>-1</sup>. (a3-c3) SEM images of In<sub>2</sub>O<sub>3</sub> after heat treatment of the corresponding In/PVP at 600 °C for 5 h (number of measurement for determining the width of nanofiber: 10).

**Figure S5**

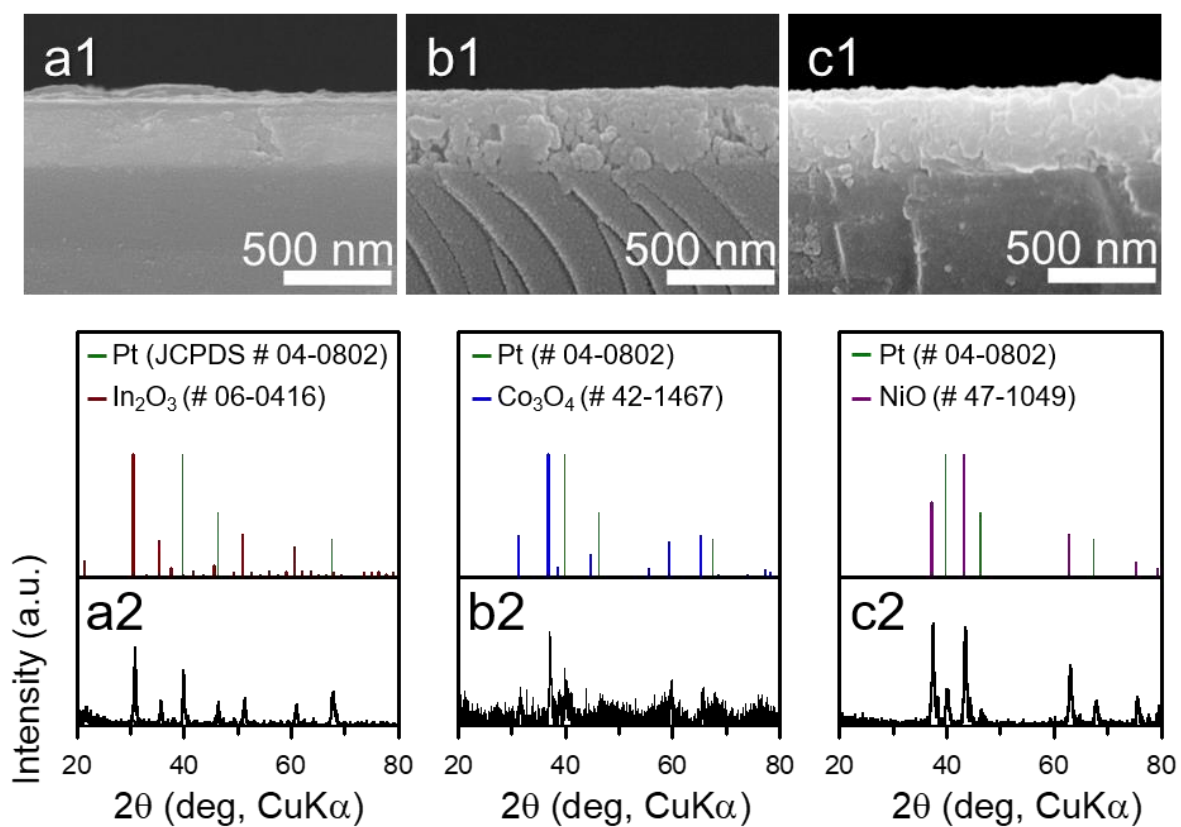

**Figure S5** (a1-c1) SEM images of (a1) In<sub>2</sub>O<sub>3</sub>-F, (b1) Co<sub>3</sub>O<sub>4</sub>-F, and (c1) NiO-F sensors. (a2-c2) XRD patterns of the corresponding thin film sensors.

**Figure S6**

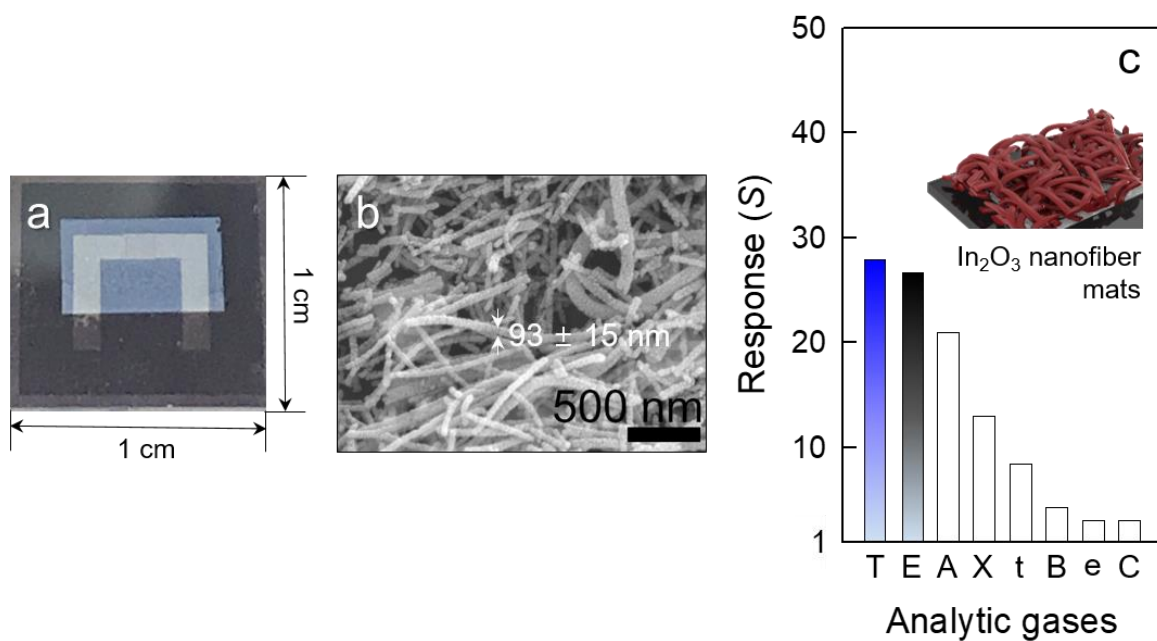

**Figure S6** (a) Optical and (b) SEM images of  $\text{In}_2\text{O}_3$  nanofiber mats sensor fabricated by c-ES (number of measurement for determining the width of nanofiber: 10). (c) Gas responses of  $\text{In}_2\text{O}_3$  nanofiber mats sensor to 5 ppm of TMA (T), ethanol (E), ammonia (A), *p*-xylene (X), toluene (t), benzene (B), ethylene (e) and CO (C) at 350 °C.

**Figure S7**

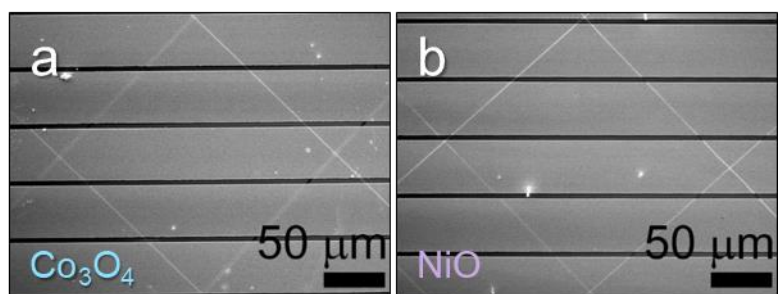

**Figure S7** (a,b) SEM images of (a) Co<sub>3</sub>O<sub>4</sub>-P, and (b) NiO-P sensors.



Figure S8

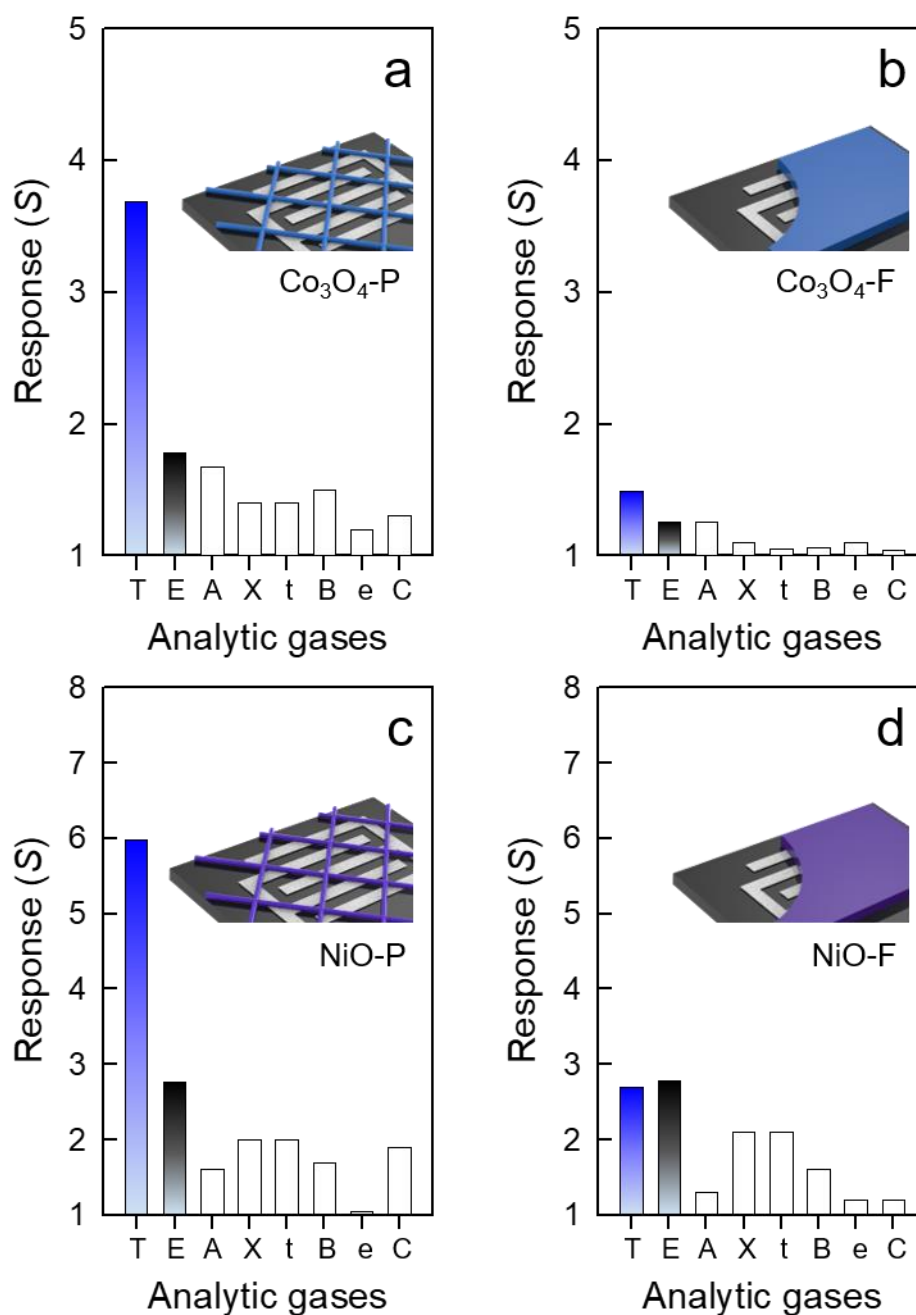

**Figure S8** (a,b) Gas responses of (a)  $\text{Co}_3\text{O}_4\text{-P}$  and (b)  $\text{Co}_3\text{O}_4\text{-F}$  sensors to 5 ppm of TMA (T), ethanol (E), ammonia (A), *p*-xylene (X), toluene (t), benzene (B), ethylene (e) and CO (C) at 225 °C. (c,d) Gas responses of (c)  $\text{NiO-P}$ , and (d)  $\text{NiO-F}$  sensors to the gases at 300 °C.

**Figure S9**

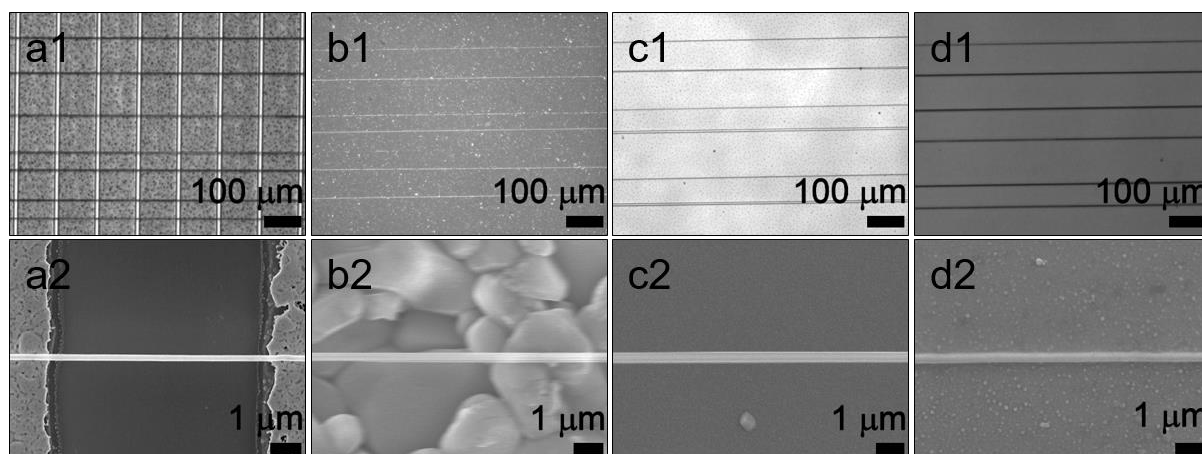

**Figure S9** (a1-d1) Optical images of In/PVP arrays on various substrates; SiO<sub>2</sub>/Si wafer with (a) Au interdigitated electrodes, (b) alumina, (c) glass, and (d) indium tin oxide (ITO) substrates. (a2-d2) SEM images of In<sub>2</sub>O<sub>3</sub> nanofibers after heat treatment of the In/PVP on the substrates at 600 °C for 5 h.

**Table S1** The compositions of solutions used in this study, and the resultant structures of precursor and metal oxides.

| Solvent<br>(g) | Polymer<br>(wt%) | Metal salts<br>(wt%)  | Structure        |                      |
|----------------|------------------|-----------------------|------------------|----------------------|
|                |                  |                       | Precursor        | After heat treatment |
| Methanol (7)   | PVP (17.4)       | Indium nitrate (1.4)  | Non-wetted fiber | Nanofiber            |
| Methanol (7)   | PVP (17.4)       | Cobalt nitrate (1.7)  | Non-wetted fiber | Nanofiber            |
| Methanol (7)   | PVP (17.4)       | Nickel nitrate (1.7)  | Non-wetted fiber | Nanofiber            |
| Ethanol (7)    | PVP (17.4)       | Indium nitrate (1.4)  | Wetted fiber     | Islands              |
| Water (7)      | PVP (17.4)       | Indium nitrate (1.4)  | Wetted fiber     | Islands              |
| Methanol (7)   | PVP (4.7)        | Indium nitrate (1.4)  | Wetted fiber     | Islands              |
| Methanol (7)   | PVP (8.9)        | Indium nitrate (1.4)  | Wetted fiber     | Islands              |
| Methanol (7)   | PVP (12.8)       | Indium nitrate (1.4)  | Wetted fiber     | Islands              |
| Methanol (7)   | PVP (19.7)       | Indium nitrate (1.4)  | Not available    | Not available        |
| Methanol (7)   | PVP (17.4)       | Indium nitrate (0)    | Non-wetted fiber | Not available        |
| Methanol (7)   | PVP (17.4)       | Indium nitrate (0.47) | Non-wetted fiber | Islands              |
| Methanol (7)   | PVP (17.4)       | Indium nitrate (0.93) | Non-wetted fiber | Islands              |
| Methanol (7)   | PVP (17.4)       | Indium nitrate (1.8)  | Entangled fiber  | Entangled nanofiber  |

**Table S2** The compositions of solutions for c-ES using PVP ( $M_w=1,300,000$ ) and metal salts reported in the literature.<sup>22-27</sup>

| Solvent                    | Metal salts                                                        | Viscosity (mPa s) | Ref. |
|----------------------------|--------------------------------------------------------------------|-------------------|------|
| Ethanol                    | Titanium(IV) isopropoxide                                          | 335               | 22   |
| Ethanol                    | Titanium tetraisopropoxide                                         | 59                | 23   |
| Ethanol                    | 1-Tetra-n-butyl titanate                                           | 330               | 24   |
| Ethanol + H <sub>2</sub> O | Iron(III) nitrate nonahydrate,<br>Cobalt (II) acetate tetrahydrate | 117               | 25   |
| Ethanol + H <sub>2</sub> O | Indium(III) Nitrate                                                | 480               | 26   |
| Ethanol + H <sub>2</sub> O | Cerium nitrate                                                     | 400               | 27   |

**Table S3** TMA response ( $S_T$ ) and selectivity ( $S_T S_E^{-1}$ ) of the sensors using  $\text{In}_2\text{O}_3$  nanostructures reported in the present study and the literature.<sup>34-38</sup>

| Structure          | Synthesis method    | TMA conc. (ppm) | $S_T$ | $S_T S_E^{-1}$ | Ref.       |
|--------------------|---------------------|-----------------|-------|----------------|------------|
| Nanofibers pattern | NFES                | 5               | 245   | 7.5            | This study |
| Thin film          | E-beam deposition   | 5               | 24    | 1              | This study |
| Nanofibers mats    | c-ES                | 5               | 28    | 1              | This study |
| Nanofibers mats    | c-ES                | 5               | 15    | 1              | 34         |
| Nanoparticles      | Precipitation       | 5               | 3     | 0.17           | 35         |
| Microrods          | Hydrothermal method | 50              | 21    | 1.75           | 36         |
| Nanospheres        | Hydrothermal method | 50              | 5     | 1              | 37         |
| Hollow microtubes  | Solution process    | 50              | 120   | 1.2            | 38         |
